# Supplementary material
Source: publisher figshare collection journal article supplement (https://sage.figshare.com/ndownloader/files/30778901)
Supplement: Supplementary file 1 [file 30778901]

Appendix

Table A.1.

List of Variables and Data Sources.

| Variable | Description and data source |
| --- | --- |
| Democracy | Dummy variable =1 if executive and legislative offices are filled through contested elections and zero otherwise, as developed by Cheibub et al. (2010). Source: Bjørnskov and Rode (2020). |
| Polity2* | Level of democracy Polity2, rescaled between zero and one. Source: Polity IV project. |
| SVMDI* | Support Vector Machines Democracy Index (SVMDI). Source: Gruendler and Krieger (2016, 2018). |
| Source | Dummy variable =1 if the constitution identifies Islamic law as a source of legislation, and zero otherwise. Source: Ahmed and Gouda (2015). |
| Supremacy | A three-point scale (from zero to two), where higher values reflect a higher level of supremacy of Islamic law. Supremacy = 0 when Islam is not the source of legislation. Source: Ahmed and Gouda (2015) and Gouda and Gutmann (2019). |
| Distance | Distance from Mecca, logarithm, own calculation. |
| Conquest | Arab conquest. Source: Chaney (2012). |
| Natural resources | Total oil and gas rents divided by population and measured in constant 2014 U.S. dollars, Logarithm. Source: Ross and Mahdavi (2015). |
| GDP per capita | GDP per capita, logarithm. Source: World Development Indicators. |
| Globalization | KOF Globalization Index. Source: Gygli et al. (2019). |
| Presidential | Presidential political system. Source: Bjørnskov and Rode (2020). |
| British legal origin | British legal origin. Source: La Porta et al. (1999). |
| French legal origin | French legal origin. Source: La Porta et al. (1999). |
| Socialist legal origin | Socialist legal origin. Source: La Porta et al. (1999). |
| Share Muslim | Muslim population share. Source: ARDA’s Religious Characteristics of States Dataset. |
| Muslim majority | Dummy Variable =1 if Muslim population share larger than 50%, own calculation. |

*used for robustness checks.

Table A.2.

Effect of Islamic Constitutions on Democracy, Probit, Marginal Effects.

|  | (1) | (2) | (3) | (4) | (5) | (6) |
| --- | --- | --- | --- | --- | --- | --- |
| Source | –0.251* | –0.203 | –0.212* |  |  |  |
| (0.099) | (0.106) | (0.106) |  |  |  |
| Supremacy |  |  |  | –0.167*** | –0.141** | –0.146** |
|  |  |  | (0.044) | (0.047) | (0.048) |
| Natural resources | –0.023* | –0.021* | –0.021* | –0.022* | –0.020* | –0.019* |
| (0.009) | (0.009) | (0.010) | (0.009) | (0.009) | (0.009) |
| GDP per capita | –0.010 | –0.019 | –0.018 | –0.008 | –0.016 | –0.014 |
| (0.030) | (0.029) | (0.029) | (0.030) | (0.029) | (0.029) |
| Globalization | 0.005* | 0.006* | 0.006* | 0.005 | 0.006* | 0.006* |
| (0.003) | (0.003) | (0.003) | (0.003) | (0.003) | (0.003) |
| Presidential | –0.066 | –0.063 | –0.065 | –0.066 | –0.063 | –0.066 |
| (0.063) | (0.062) | (0.062) | (0.062) | (0.061) | (0.061) |
| British legal origin | –0.008 | –0.023 | –0.019 | –0.006 | –0.021 | –0.017 |
| (0.061) | (0.059) | (0.060) | (0.061) | (0.059) | (0.059) |
| Socialist legal origin | –0.225* | –0.247** | –0.240** | –0.229* | –0.251** | –0.244** |
| (0.091) | (0.088) | (0.088) | (0.090) | (0.087) | (0.087) |
| Share Muslim |  | –0.095 |  |  | –0.089 |  |
|  | (0.074) |  |  | (0.073) |  |
| Majority Muslim |  |  | –0.066 |  |  | –0.062 |
|  |  | (0.061) |  |  | (0.060) |
| Observations | 3,827 | 3,827 | 3,827 | 3,827 | 3,827 | 3,827 |
| Countries | 160 | 160 | 160 | 160 | 160 | 160 |

Dependent variable is Democracy. Table shows the marginal effects based on Probit regressions of Model (1). All models include region- and year-fixed effects; country-clustered standard errors are shown in parentheses: *0.05, **0.01 and ***0.001.

Table A.3.

First Stage.

|  | (1) | (2) | (3) | (4) | (5) | (6) |
| --- | --- | --- | --- | --- | --- | --- |
| **Distance (IV)** | –0.171* | –0.168* | –0.173* | –0.309* | –0.306* | –0.312* |
| (0.068) | (0.068) | (0.067) | (0.132) | (0.132) | (0.130) |
| **Conquest (IV)** | 0.244* | 0.154 | 0.143 | 0.466* | 0.371 | 0.334 |
| (0.114) | (0.155) | (0.146) | (0.218) | (0.261) | (0.260) |
| Natural resources | 0.010 | 0.009 | 0.008 | 0.021* | 0.020* | 0.019 |
| (0.006) | (0.006) | (0.006) | (0.010) | (0.010) | (0.011) |
| GDP per capita | 0.040 | 0.046 | 0.046 | 0.079 | 0.085 | 0.086* |
| (0.025) | (0.027) | (0.026) | (0.042) | (0.044) | (0.043) |
| Globalization | –0.005 | –0.005 | –0.005 | –0.010* | –0.010* | –0.010* |
| (0.003) | (0.003) | (0.003) | (0.004) | (0.004) | (0.004) |
| Presidential | 0.006 | –0.004 | –0.002 | –0.007 | –0.018 | –0.018 |
| (0.035) | (0.034) | (0.034) | (0.063) | (0.061) | (0.063) |
| British legal origin | 0.053 | 0.044 | 0.043 | 0.115 | 0.106 | 0.102 |
| (0.051) | (0.050) | (0.049) | (0.085) | (0.085) | (0.083) |
| French legal origin | 0.028 | 0.021 | 0.024 | 0.053 | 0.046 | 0.047 |
| (0.047) | (0.046) | (0.046) | (0.088) | (0.089) | (0.087) |
| Socialist legal origin | –0.100* | –0.096* | –0.098* | –0.188* | –0.184* | –0.186* |
| (0.044) | (0.045) | (0.044) | (0.087) | (0.087) | (0.087) |
| Share Muslim |  | 0.131 |  |  | 0.137 |  |
|  | (0.122) |  |  | (0.168) |  |
| Majority Muslim |  |  | 0.120 |  |  | 0.158 |
|  |  | (0.081) |  |  | (0.120) |
| Constant | 0.130 | 0.079 | 0.093 | 0.209 | 0.155 | 0.161 |
| (0.178) | (0.180) | (0.169) | (0.326) | (0.321) | (0.309) |
| Observations | 3,827 | 3,827 | 3,827 | 3,827 | 3,827 | 3,827 |
| Countries | 160 | 160 | 160 | 160 | 160 | 160 |

First stage results of 2SLS instrumental variable regressions. Dependent variable is Islamic law as a source of legislation in columns (1)–(3) and supremacy of Islamic law in columns (4)–(6). The excludable instruments are the log-distance to Mecca and an indicator for Arab conquest. All models include region- and year-fixed effects; country-clustered standard errors are shown in parentheses: *0.05, **0.01 and ***0.001.

Table A.4.

Alternative Democracy Measures as Dependent Variables, OLS.

|  | (1) | (2) | (3) | (4) | (5) | (6) |
| --- | --- | --- | --- | --- | --- | --- |
| DV=Polity2 | DV=Polity2 | DV=Polity2 | DV=SVMDI | DV=SVMDI | DV=SVMDI |
| Source | –0.262*** | –0.213** | –0.215** | –0.272*** | –0.228** | –0.220** |
| (0.070) | (0.075) | (0.074) | (0.078) | (0.084) | (0.081) |
| Natural resources | –0.021*** | –0.018** | –0.018** | –0.020** | –0.018** | –0.018** |
| (0.006) | (0.006) | (0.006) | (0.006) | (0.006) | (0.006) |
| GDP per capita | –0.029 | –0.036 | –0.035 | –0.025 | –0.030 | –0.030 |
| (0.021) | (0.020) | (0.020) | (0.025) | (0.023) | (0.023) |
| Globalization | 0.008*** | 0.009*** | 0.009*** | 0.007** | 0.007** | 0.007** |
| (0.002) | (0.002) | (0.002) | (0.002) | (0.002) | (0.002) |
| Presidential | –0.052 | –0.044 | –0.047 | –0.046 | –0.039 | –0.041 |
| (0.044) | (0.043) | (0.043) | (0.041) | (0.040) | (0.040) |
| British legal origin | –0.022 | –0.018 | –0.020 | 0.002 | 0.007 | 0.005 |
| (0.066) | (0.063) | (0.064) | (0.079) | (0.076) | (0.076) |
| French legal origin | –0.033 | –0.014 | –0.021 | –0.044 | –0.028 | –0.031 |
| (0.063) | (0.059) | (0.060) | (0.074) | (0.070) | (0.071) |
| Socialist legal orig. | –0.177* | –0.172* | –0.171* | –0.156 | –0.153 | –0.151 |
| (0.072) | (0.069) | (0.069) | (0.083) | (0.081) | (0.081) |
| Share Muslim |  | –0.114 |  |  | –0.100 |  |
|  | (0.066) |  |  | (0.072) |  |
| Majority Muslim |  |  | –0.086 |  |  | –0.094 |
|  |  | (0.048) |  |  | (0.053) |
| Constant | 0.419** | 0.456*** | 0.446*** | 0.326* | 0.357* | 0.354* |
| (0.130) | (0.132) | (0.132) | (0.159) | (0.162) | (0.161) |
| Observations | 3,710 | 3,710 | 3,710 | 3,827 | 3,827 | 3,827 |
| Countries | 156 | 156 | 156 | 160 | 160 | 160 |

Dependent variable is Polity2 in (1)─(3) and SVMDI in columns (4)─(6). All regressions are estimated by OLS. See [Table 2.](#Table2" \o "Table2)

Table A.5.

Alternative Democracy Measures as Dependent Variables, 2SLS.

|  | (1) | (2) | (3) | (4) | (5) | (6) |
| --- | --- | --- | --- | --- | --- | --- |
| DV=Polity2 | DV=Polity2 | DV=Polity2 | DV=SVMDI | DV=SVMDI | DV=SVMDI |
| Source | –0.597*** | –0.596** | –0.594** | –0.680*** | –0.763** | –0.706** |
| (0.148) | (0.197) | (0.186) | (0.187) | (0.272) | (0.250) |
| Natural resources | –0.012* | –0.012* | –0.013* | –0.011 | –0.011 | –0.011 |
| (0.006) | (0.006) | (0.006) | (0.007) | (0.007) | (0.007) |
| GDP per capita | –0.014 | –0.014 | –0.014 | –0.003 | 0.003 | –0.001 |
| (0.027) | (0.030) | (0.030) | (0.033) | (0.039) | (0.037) |
| Globalization | 0.006* | 0.006* | 0.006* | 0.004 | 0.004 | 0.004 |
| (0.003) | (0.003) | (0.003) | (0.004) | (0.004) | (0.004) |
| Presidential | –0.055 | –0.055 | –0.055 | –0.042 | –0.047 | –0.044 |
| (0.045) | (0.046) | (0.046) | (0.043) | (0.045) | (0.043) |
| British legal origin | 0.021 | 0.021 | 0.020 | 0.063 | 0.067 | 0.064 |
| (0.064) | (0.064) | (0.064) | (0.080) | (0.084) | (0.082) |
| French legal origin | 0.026 | 0.026 | 0.025 | 0.031 | 0.029 | 0.030 |
| (0.059) | (0.059) | (0.060) | (0.072) | (0.074) | (0.073) |
| Socialist legal origin | –0.187** | –0.187** | –0.187** | –0.171* | –0.176* | –0.173* |
| (0.069) | (0.069) | (0.069) | (0.079) | (0.081) | (0.080) |
| Share Muslim |  | 0.002 |  |  | 0.072 |  |
|  | (0.100) |  |  | (0.121) |  |
| Majority Muslim |  |  | 0.004 |  |  | 0.025 |
|  |  | (0.069) |  |  | (0.083) |
| Constant | 0.345* | 0.344* | 0.345* | 0.219 | 0.183 | 0.208 |
| (0.139) | (0.150) | (0.145) | (0.177) | (0.204) | (0.191) |
| Underidentification | 17.78 | 11.62 | 12.94 | 16.49 | 9.45 | 11.03 |
| p-value | (0.000) | (0.003) | (0.002) | (0.000) | (0.009) | (0.004) |
| Kleibergen-Paap F | 15.93 | 9.33 | 10.91 | 13.54 | 6.33 | 8.12 |
| Hansen J | 0.40 | 0.48 | 0.53 | 0.04 | 0.29 | 0.15 |
| p-value | (0.527) | (0.489) | (0.468) | (0.839) | (0.588) | (0.696) |
| Observations | 3,710 | 3,710 | 3,710 | 3,827 | 3,827 | 3,827 |
| Countries | 156 | 156 | 156 | 160 | 160 | 160 |

Dependent variable is Polity2 in (1)─(3) and SVMDI in columns (4)─(6). All regressions are estimated by 2SLS instrumental variable regressions. See [Table 3.](#Table3" \o "Table3)

Table A.6.

Additional Control Variable on Freedom of Religion in Constitutions, OLS.

|  | (1) | (2) | (3) | (4) | (5) | (6) |
| --- | --- | --- | --- | --- | --- | --- |
| Source | –0.239** | –0.215* | –0.228* |  |  |  |
| (0.079) | (0.098) | (0.093) |  |  |  |
| Supremacy |  |  |  | –0.141*** | –0.128** | –0.135** |
|  |  |  | (0.037) | (0.048) | (0.045) |
| Natural resources | –0.023* | –0.022* | –0.023* | –0.022* | –0.021* | –0.022* |
| (0.010) | (0.010) | (0.010) | (0.010) | (0.010) | (0.010) |
| GDP per capita | –0.051 | –0.053 | –0.052 | –0.049 | –0.052 | –0.051 |
| (0.035) | (0.034) | (0.034) | (0.035) | (0.034) | (0.034) |
| Globalization | 0.008* | 0.008* | 0.008* | 0.008* | 0.008* | 0.008* |
| (0.004) | (0.004) | (0.004) | (0.004) | (0.004) | (0.004) |
| Presidential | –0.034 | –0.032 | –0.034 | –0.038 | –0.035 | –0.037 |
| (0.067) | (0.067) | (0.067) | (0.067) | (0.067) | (0.067) |
| British legal origin | –0.154 | –0.149 | –0.152 | –0.148 | –0.143 | –0.146 |
| (0.120) | (0.119) | (0.120) | (0.120) | (0.119) | (0.120) |
| French legal origin | –0.159 | –0.147 | –0.154 | –0.154 | –0.142 | –0.149 |
| (0.117) | (0.114) | (0.117) | (0.117) | (0.115) | (0.117) |
| Socialist legal origin | –0.379** | –0.374** | –0.376** | –0.379** | –0.374** | –0.377** |
| (0.135) | (0.135) | (0.137) | (0.135) | (0.135) | (0.136) |
| Freedom of religion | –0.001 | –0.001 | –0.001 | –0.001 | –0.001 | –0.001 |
| (0.001) | (0.001) | (0.001) | (0.001) | (0.001) | (0.001) |
| Share Muslim |  | –0.054 |  |  | –0.056 |  |
|  | (0.115) |  |  | (0.113) |  |
| Majority Muslim |  |  | –0.022 |  |  | –0.023 |
|  |  | (0.093) |  |  | (0.092) |
| Constant | 0.438 | 0.452 | 0.444 | 0.430 | 0.445 | 0.436 |
| (0.250) | (0.254) | (0.251) | (0.250) | (0.254) | (0.251) |
| Observations | 2,681 | 2,681 | 2,681 | 2,681 | 2,681 | 2,681 |
| Countries | 152 | 152 | 152 | 152 | 152 | 152 |

See [Table 2.](#Table2" \o "Table2)

Table A.7.

Additional Control Variables on External Effects, OLS.

|  | (1) | (2) | (3) | (4) | (5) | (6) |
| --- | --- | --- | --- | --- | --- | --- |
| Source | –0.285*** | –0.239** | –0.241** | –0.283** | –0.234* | –0.243* |
| (0.079) | (0.091) | (0.091) | (0.091) | (0.104) | (0.105) |
| Natural resources | –0.023* | –0.021* | –0.021* | –0.023 | –0.021 | –0.021 |
| (0.009) | (0.009) | (0.010) | (0.012) | (0.012) | (0.012) |
| GDP per capita | –0.024 | –0.028 | –0.027 | –0.020 | –0.025 | –0.024 |
| (0.034) | (0.033) | (0.034) | (0.044) | (0.044) | (0.044) |
| Globalization | 0.006* | 0.006* | 0.006* | 0.005 | 0.006 | 0.006 |
| (0.003) | (0.003) | (0.003) | (0.004) | (0.004) | (0.004) |
| Presidential | –0.087 | –0.081 | –0.083 | –0.076 | –0.069 | –0.072 |
| (0.065) | (0.065) | (0.065) | (0.099) | (0.098) | (0.098) |
| British legal origin | –0.038 | –0.033 | –0.035 | –0.444** | –0.406* | –0.416* |
| (0.102) | (0.100) | (0.101) | (0.159) | (0.168) | (0.163) |
| French legal origin | –0.065 | –0.049 | –0.054 | –0.470** | –0.418* | –0.435* |
| (0.097) | (0.093) | (0.093) | (0.165) | (0.175) | (0.167) |
| Socialist legal origin | –0.249* | –0.243* | –0.242* | –0.791*** | –0.758*** | –0.764*** |
| (0.112) | (0.111) | (0.112) | (0.182) | (0.190) | (0.188) |
| Spatial democracy | 0.025 | 0.037 | 0.039 |  |  |  |
| (0.101) | (0.098) | (0.097) |  |  |  |
| ODA |  |  |  | –0.004 | –0.004 | –0.005 |
|  |  |  | (0.046) | (0.044) | (0.045) |
| Share Muslim |  | –0.102 |  |  | –0.109 |  |
|  | (0.102) |  |  | (0.105) |  |
| Majority Muslim |  |  | –0.079 |  |  | –0.075 |
|  |  | (0.084) |  |  | (0.085) |
| Constant | 0.302 | 0.332 | 0.323 | 0.689 | 0.680 | 0.685 |
| (0.230) | (0.233) | (0.232) | (0.460) | (0.459) | (0.457) |
| Observations | 3,827 | 3,827 | 3,827 | 2,757 | 2,757 | 2,757 |
| Countries | 160 | 160 | 160 | 126 | 126 | 126 |

See [Table 2.](#Table2" \o "Table2)

Table A.8.

Additional Control Variables on Education and Inequality, OLS.

|  | (1) | (2) | (3) | (4) | (5) | (6) |
| --- | --- | --- | --- | --- | --- | --- |
| Source | –0.375*** | –0.352*** | –0.365*** | –0.272** | –0.204* | –0.210* |
| (0.069) | (0.088) | (0.088) | (0.083) | (0.098) | (0.097) |
| Natural resources | –0.019 | –0.018 | –0.019 | –0.023* | –0.020* | –0.020* |
| (0.010) | (0.010) | (0.010) | (0.010) | (0.010) | (0.010) |
| GDP per capita | –0.041 | –0.042 | –0.041 | –0.018 | –0.028 | –0.026 |
| (0.042) | (0.041) | (0.041) | (0.039) | (0.037) | (0.037) |
| Globalization | 0.004 | 0.004 | 0.004 | 0.005 | 0.005 | 0.005 |
| (0.004) | (0.004) | (0.004) | (0.003) | (0.003) | (0.003) |
| Presidential | –0.080 | –0.078 | –0.080 | –0.078 | –0.067 | –0.072 |
| (0.067) | (0.067) | (0.067) | (0.066) | (0.065) | (0.065) |
| British legal origin | –0.027 | –0.023 | –0.026 | –0.031 | –0.011 | –0.020 |
| (0.096) | (0.096) | (0.096) | (0.098) | (0.095) | (0.096) |
| French legal origin | –0.007 | 0.001 | –0.005 | –0.070 | –0.031 | –0.044 |
| (0.090) | (0.088) | (0.089) | (0.094) | (0.088) | (0.089) |
| Socialist legal origin | –0.299* | –0.297* | –0.298* | –0.237* | –0.232* | –0.232* |
| (0.125) | (0.124) | (0.126) | (0.104) | (0.100) | (0.101) |
| Education | 0.019 | 0.018 | 0.019 |  |  |  |
| (0.021) | (0.021) | (0.021) |  |  |  |
| Inequality |  |  |  | –0.181 | –0.367 | –0.307 |
|  |  |  | (0.528) | (0.560) | (0.547) |
| Share Muslim |  | –0.055 |  |  | –0.173 |  |
|  | (0.120) |  |  | (0.119) |  |
| Majority Muslim |  |  | –0.019 |  |  | –0.126 |
|  |  | (0.099) |  |  | (0.092) |
| Constant | 0.369 | 0.384 | 0.373 | 0.438 | 0.583 | 0.538 |
| (0.251) | (0.254) | (0.251) | (0.342) | (0.369) | (0.359) |
| Observations | 3,261 | 3,261 | 3,261 | 3,187 | 3,187 | 3,187 |
| Countries | 136 | 136 | 136 | 157 | 157 | 157 |

See [Table 2.](#Table2" \o "Table2)
